# Supplementary material for: Dual-ligand Eu-MOF for ratiometric fluorescence sensing and visual detection of fluoride ions
Source: Royal Society of Chemistry journal article supplement (doi:10.1039/d4nj05358c), 2025-01-01
Supplement: d4nj05358c1.pdf [file d4nj05358c1.pdf]

# Dual-Ligand Eu-MOF for Ratiometric Fluorescence Sensing and Visual Detection of Fluoride Ions

Wen-Zhe Chen, Ting-Ting Xiao, Lin-Lin Wang, Min Zhang\*, Xue-  
Bo Yin\*

*Institute for Frontier Medical Technology, College of Chemistry and Chemical Engineering, Shanghai*

*University of Engineering Science, Shanghai 201620, China*

*\*Email: [xbyin@nankai.edu.cn](mailto:xbyin@nankai.edu.cn); [zhangmin@sues.edu.cn](mailto:zhangmin@sues.edu.cn)*

## Contents

**Figure S1.** The emission and excitation spectra of (A) Eu-AIP, (B) Eu-BDC,(C) Eu-AIP/BDC, (D) The UV-vis spectra of the 5-AIP (black line), H<sub>2</sub>BDC(red line) and the Eu-AIP/BDC(blue line).

**Figure S2.** The thermogravimetric analysis (TGA) of Eu-AIP/BDC.

**Figure S3.** The response time of Eu-AIP/BDC to F<sup>-</sup>.

**Figure S4.** The fluorescence spectra and PXRD patterns of Eu-AIP/BDC after being dispersing in water for different time ( $\lambda_{ex}=280$  nm).

**Figure S5.** The fluorescence spectra and PXRD patterns of Eu-AIP/BDC with pH 5.0 - 10.0 ( $\lambda_{ex}=280$  nm).

**Figure S6.** Relationship between the polarity index of different solvents and the fluorescence intensity of the two emission centers.

**Figure S7.** The relationship between different water content and the emission intensity of Eu-AIP/BDC at 616 nm. ( $\lambda_{ex}=280$  nm).

**Table S1.** The calculation of LOD.  $\sigma$  is approximately equal to the slope of the calibration curve; s is the standard deviation for N parallel blank solutions.

**Figure S8.** Fluorescent experiments of Eu-AIP/BDC in samples: emission spectra (A) and ratio col (B) of reference with different concentration F<sup>-</sup>; emission spectra (C) (E) and ratio column (D) (F) of the toothpaste with and without F<sup>-</sup>.

**Figure S9.** Fluorescent experiments of Eu-AIP/BDC in samples: emission spectra (A)

and ratio col (B) of River water with and without  $F^-$ ; emission spectra (C) and ratio column (D) of the Tap water with and without  $F^-$ ; emission spectra (E) and ratio column (F) of the Purified water with and without  $F^-$ .

**Figure S10.** The PRXD of Eu-AIP/BDC treated with  $F^-$  ions before and after.

**Table S2.** Comparing the performance of various systems of fluorescent probes for  $F^-$  in terms of response time and detection limit.

## Results and Discussions

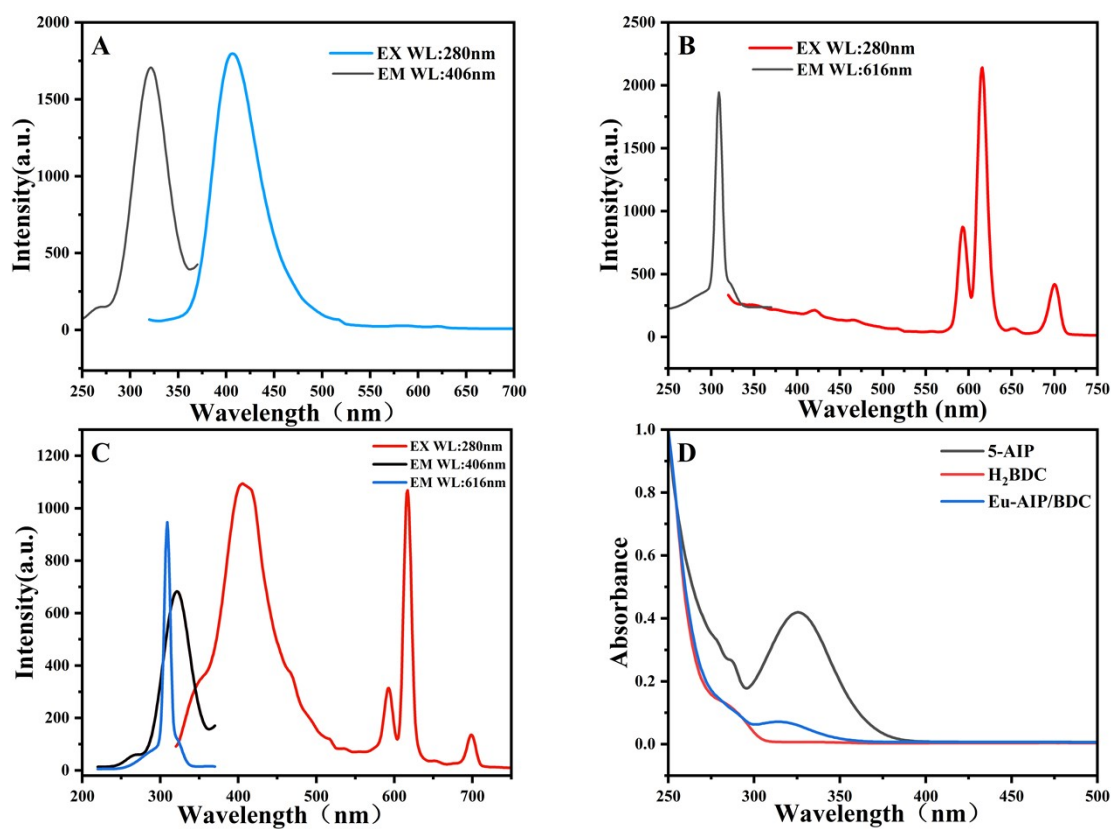

**Figure S1.** The emission and excitation spectra of (A) Eu-AIP, (B) Eu-BDC, (C) Eu-AIP/BDC, (D) The UV-vis spectra of the 5-AIP (black line), H<sub>2</sub>BDC (red line) and the Eu-AIP/BDC (blue line).

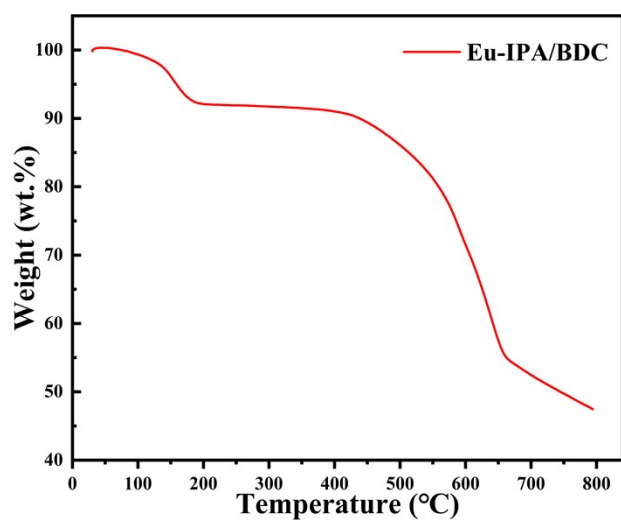

**Figure S2.** The thermogravimetric analysis (TGA) of Eu-AIP/BDC.

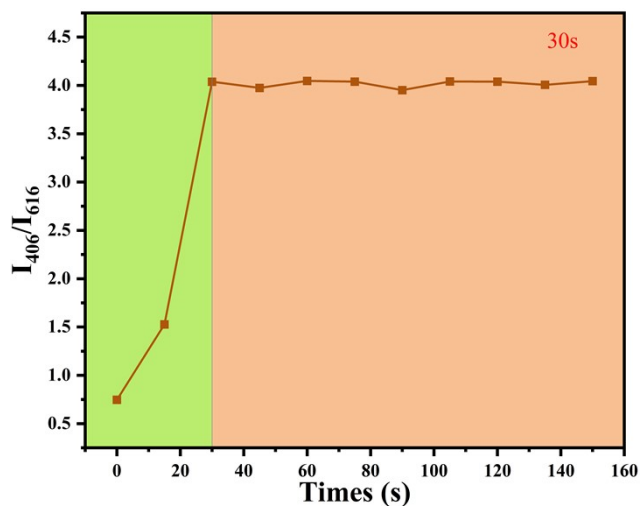

**Figure S3.** The response time of Eu-AIP/BDC to  $F^-$ .

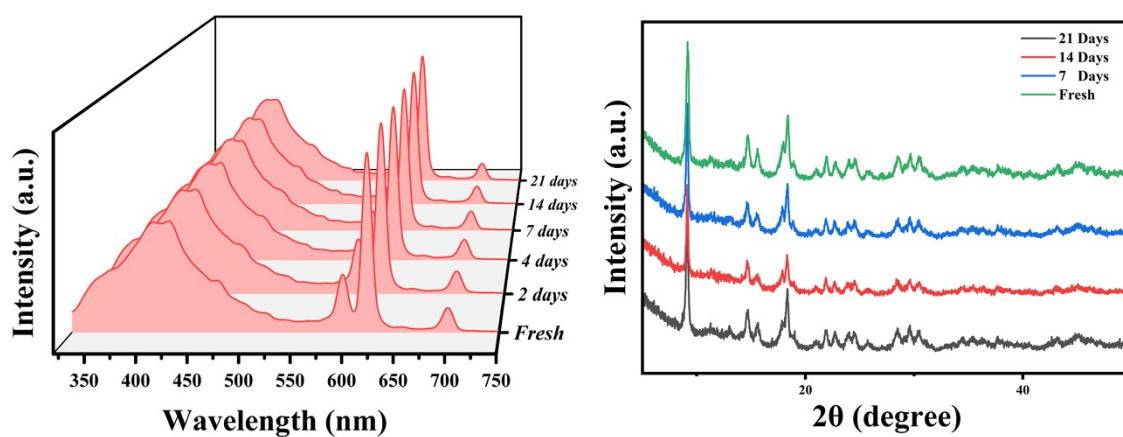

**Figure S4.** The fluorescence spectra and PXRD patterns of Eu-AIP/BDC after being dispersing in water for different time ( $\lambda_{ex}=280$  nm).

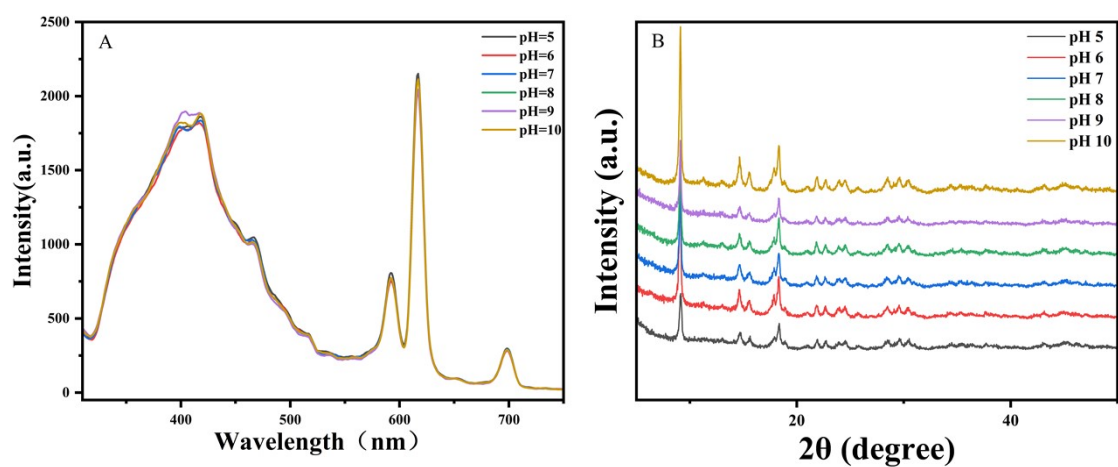

**Figure S5.** The fluorescence spectra and PXRD patterns of Eu-AIP/BDC with pH 5.0 - 10.0 ( $\lambda_{ex}=280$  nm).

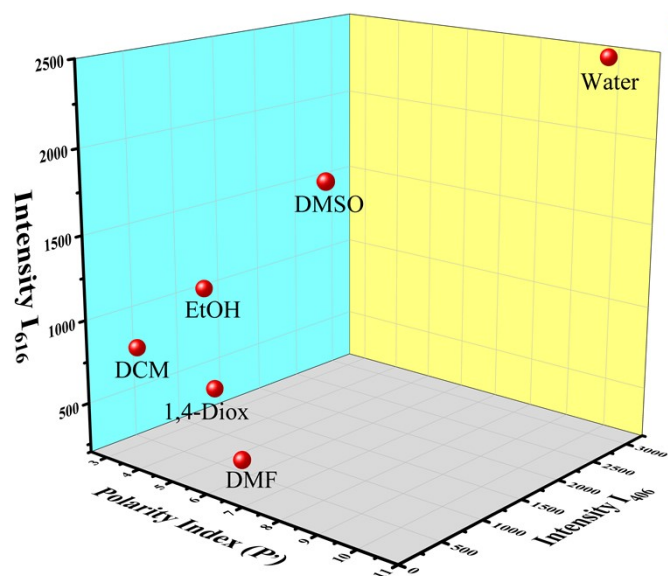

**Figure S6.** Relationship between the polarity index of different solvents and the fluorescence intensity of the two emission centers.

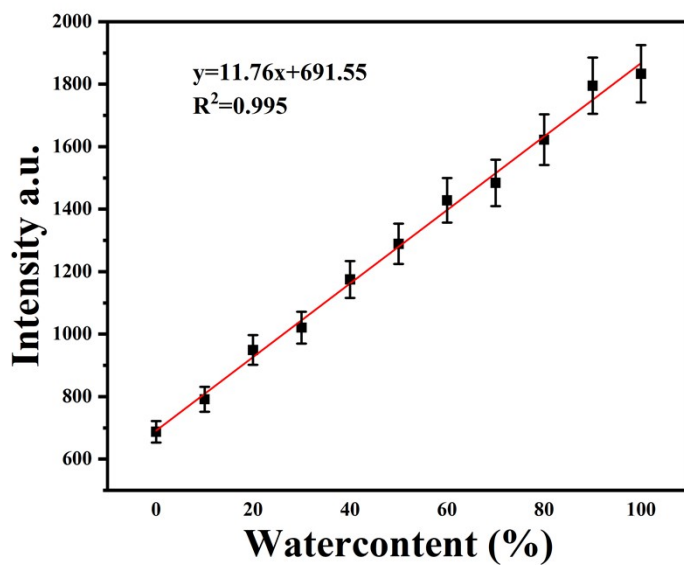

**Figure S7.** The relationship between different water content and the emission intensity of Eu-AIP/BDC at 616 nm. ( $\lambda_{ex}=280$  nm).

**Table S1.** The calculation of LOD.  $\sigma$  is approximately equal to the slope of the calibration curve;  $s$  is the standard deviation for  $N$  parallel blank solutions

| Formula                           | Blank signal     |                  |                                    | $\sigma$ | $s$           | D/ $\mu\text{M}$ |
|-----------------------------------|------------------|------------------|------------------------------------|----------|---------------|------------------|
|                                   | I <sub>406</sub> | I <sub>616</sub> | I <sub>406</sub> /I <sub>616</sub> |          |               |                  |
| <b>D = 3<math>\sigma</math>/s</b> | 1                | 1693             | 2582                               | 0.655    | <b>0.0016</b> | <b>0.015</b>     |
|                                   | 2                | 1683             | 2551                               | 0.659    |               |                  |
|                                   | 3                | 1673             | 2543                               | 0.657    |               |                  |

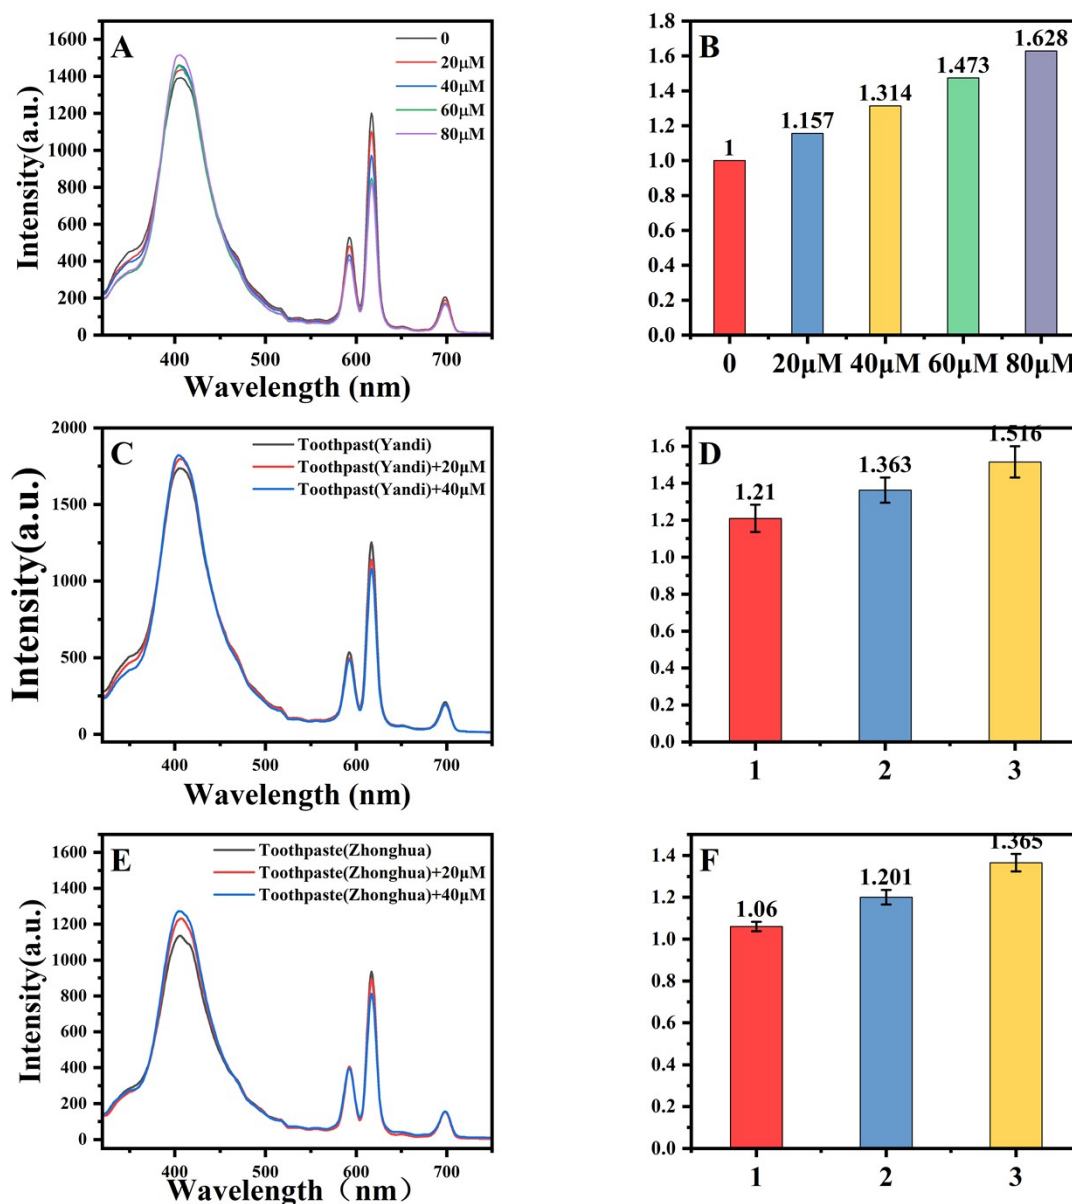

**Figure S8.** Fluorescent experiments of Eu-AIP/BDC in samples: emission spectra (A) and ratio column (B) of reference with different concentration F<sup>-</sup>; emission spectra (C) (E) and ratio column (D) (F) of the toothpaste with and without F<sup>-</sup>.

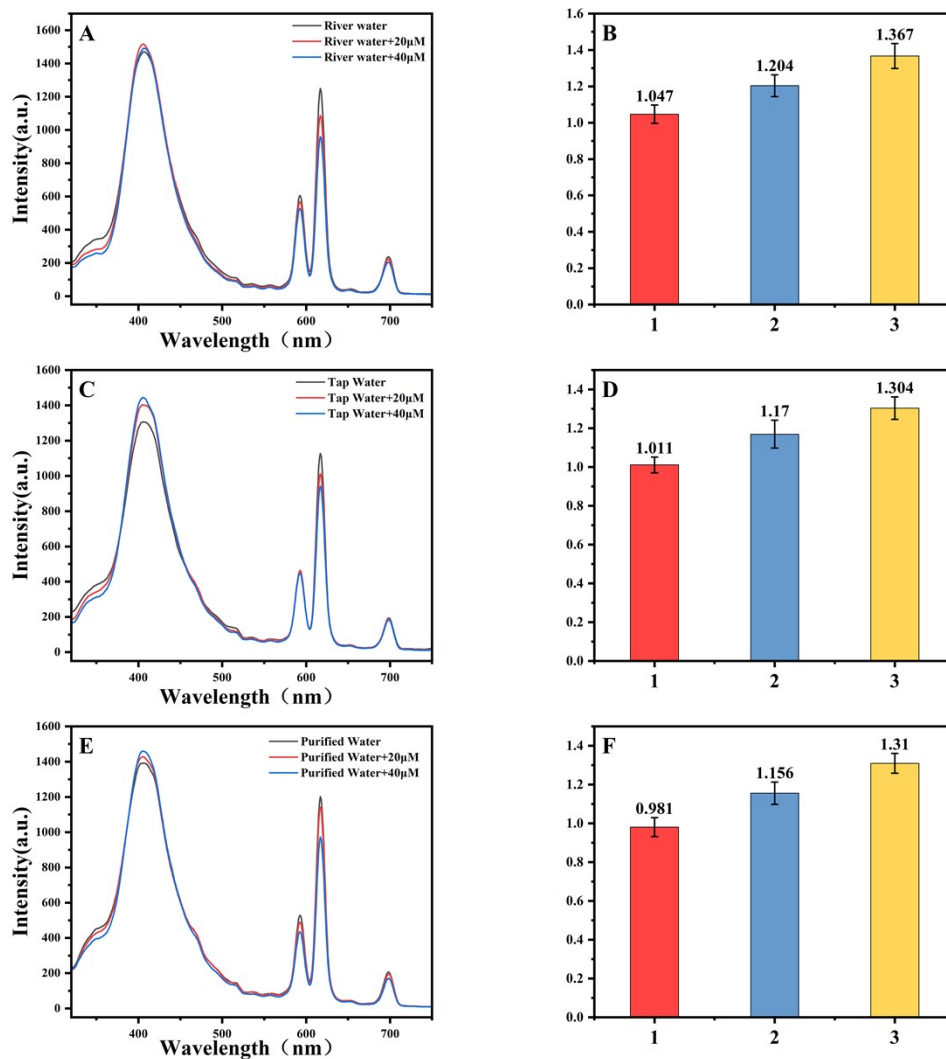

**Figure S9.** Fluorescent experiments of Eu-AIP/BDC in samples: emission spectra (A) and ratio column (B) of River water with and without  $F^-$ ; emission spectra (C) and ratio column (D) of the Tap water with and without  $F^-$ ; emission spectra (E) and ratio column (F) of the Purified water with and without  $F^-$

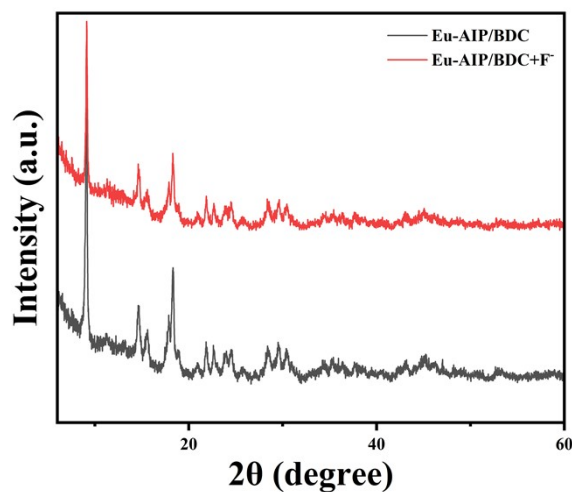

**Figure S10.** The PRXD of Eu-AIP/BDC treated with  $F^-$  ions before and after.

**Table S2.** Comparing the performance of various systems of fluorescent probes for F<sup>-</sup> in terms of response time and detection limit.

| MOF                            | Linear         | LOD           | Time  | Visual detection | Ref       |
|--------------------------------|----------------|---------------|-------|------------------|-----------|
| Eu-AIP/BDC                     | 0–100 $\mu$ M  | 0.32 $\mu$ M  | 30s   | yes              | This work |
| Eu <sup>3+</sup> @UiO-66-IPA   | 50–250 $\mu$ M | 0.22 $\mu$ M  | -     | yes              | 1         |
| Zr-Mof                         | 1–50 $\mu$ M   | 17.8 $\mu$ M  | -     | No               | 2         |
| Tb <sup>3+</sup> @UIO66        | 0.1–0.6mM      | 4.02 $\mu$ M  | >30s  | yes              | 3         |
| UiO-66 (NH <sub>2</sub> )-FITC | 2–150 $\mu$ M  | 3.45 $\mu$ M  | -     | No               | 4         |
| EuTPTC-NH <sub>2</sub>         | 0-5.12 mM      | 11.26 $\mu$ M | 60s   | No               | 5         |
| UiO-66-NH <sub>2</sub> @RhB    | 0-200 $\mu$ M  | 1.55 $\mu$ M  | -     | No               | 6         |
| Eu-MOF                         | 0–515 $\mu$ M  | 1.14 $\mu$ M  | -     | No               | 7         |
| Tb/Eu(TATB)                    | 0–45 $\mu$ M   | 2.30 $\mu$ M  | 30min | Yes              | 8         |
| FS@UiO-66                      | 0–0.4 mM       | 4.40 $\mu$ M  | 15min | No               | 9         |
| Y-TCCP MOFs                    | 1–200 $\mu$ M  | 0.25 $\mu$ M  | 3min  | No               | 10        |

## REFERENCES

- 1 J. Chen, T. Guo, H. Gao, T. He, J. Li, H. Li, X. Liu and A. Li, *ACS Applied Materials & Interfaces*, 2024, **16**, 60278–60287.
- 2 Y. Zhu, L. Zhu, W. Song and C. Deng, *Inorganic Chemistry Communications*, 2023, **154**, 110917.
- 3 J. Li, M. Liu, J. Li and X. Liu, *Talanta*, 2023, **259**, 124521.
- 4 Q. Li, H. Chen, S. You, Z. Lin, Z. Chen, F. Huang and B. Qiu, *Microchemical Journal*, 2023, **186**, 108318.
- 5 Amino-Functionalized Single-Lanthanide Metal–Organic Framework as a Ratiometric Fluorescent Sensor for Quantitative Visual Detection of Fluoride Ions | *Inorganic Chemistry*, <https://pubs.acs.org/doi/full/10.1021/acs.inorgchem.2c02533>, (accessed 21 January 2025).
- 6 M. Zhang, R. Liang, K. Li, T. Chen, S. Li, Y. Zhang, D. Zhang and X. Chen, *Spectrochimica Acta Part A: Molecular and Biomolecular Spectroscopy*, 2022, **271**, 120896.
- 7 H. Che, Y. Li, S. Zhang, W. Chen, X. Tian, C. Yang, L. Lu, Z. Zhou and Y. Nie, *Sensors and Actuators B: Chemical*, 2020, **324**, 128641.
- 8 X. Zeng, J. Hu, M. Zhang, F. Wang, L. Wu and X. Hou, *Anal. Chem.*, 2020, **92**, 2097–2102.
- 9 X. Zhao, Y. Wang, X. Hao and W. Liu, *Applied Surface Science*, 2017, **402**, 129–135.
- 10 X. Wang, C. Chu, Y. Wu, Y. Deng, J. Zhou, M. Yang, S. Zhang, D. Huo and C. Hou, *Sensors and Actuators B: Chemical*, 2020, **321**, 128455.
